# Supplementary material for: A protocol for a systematic review of birth preparedness and complication readiness programs
Source: PubMed Central journal article supplement (PMC3599634; doi:10.1186/2046-4053-2-11), 2013-02-08
Supplement: 2046-4053-2-11-S4.pdf [file 2046-4053-2-11-S4.pdf]

ADDITIONAL FILE 4

Birth Preparedness and Complication Readiness (BP/CR) Matrix (adapted from MNHP)

| Policymaker                                                                                                                                                                                                                              | Facility                                                                                                                                                                                                                                                         | Provider                                                                                                                                                                                                                                                                                   | Community                                                                                                                                                                                                                                                                   | Family                                                                                                                                                                                                                                                            | Woman                                                                                                                                                                                        |
|------------------------------------------------------------------------------------------------------------------------------------------------------------------------------------------------------------------------------------------|------------------------------------------------------------------------------------------------------------------------------------------------------------------------------------------------------------------------------------------------------------------|--------------------------------------------------------------------------------------------------------------------------------------------------------------------------------------------------------------------------------------------------------------------------------------------|-----------------------------------------------------------------------------------------------------------------------------------------------------------------------------------------------------------------------------------------------------------------------------|-------------------------------------------------------------------------------------------------------------------------------------------------------------------------------------------------------------------------------------------------------------------|----------------------------------------------------------------------------------------------------------------------------------------------------------------------------------------------|
| Creates an environment that ensures evidence based skilled ANC, adequate resources, encourages participation in policy making by communities, families, individuals, integrates BP/CR into programs                                      | Is equipped, staffed and managed to provide skilled A with essential drugs and equipment for ANC, follows guidelines has functional emergency system, ensures skilled care 24/7, is gender and culturally sensitive, involves communities and reviews cases      | Provides skilled ANC both technical (prevent, screen and treatment of disease) and educational (counseling and education on danger signs, health promotion), assists and promotes formulation of birth plan, respects community expectations and educates about BP/CR                      | Pregnancy<br>Advocates for skilled ANC, facilitates BP/CR actions through education of community members about birth preparedness, has a functional (financial, practical) system, acts according to plans, and advocates through dialogue with providers and policy makers | Supports pregnant woman's birth plans, advocates for skilled ANC, recognizes danger signs and acts according to plan, has knowledge on available (financial, practical) systems and knows how to access them                                                      | Prepares for birth with at least 4 ANC visits, develops a birth plan, has knowledge on available (financial, practical) systems, recognizes danger signs and acts according to the plan      |
| Promotes improved care during labor, ensures evidence based skilled care policies, supports policies for management of complications, ensures adequate levels of resources and protocols, encourages participation                       | Has essential drugs and equipment, follows guidelines on appropriate management of labor, has appropriate space for delivery, functional emergency system, ensures skilled care 24/7, is gender and culturally sensitive, involves communities and reviews cases | Labor and childbirth<br>Provides skilled care during labor and childbirth (use of parthograph emotional and physical support, clean and safe delivery, recognizes complications, referral when indicated), supports and respects community expectations and educates about BP/CR           | Advocates for skilled provider at birth, makes sure woman has labor support, assists in transportation, recognizes danger signs, supports mother/baby friendly decision making, is in dialogue with and supports facility                                                   | Recognizes normal labor, advocates for skilled healthcare, facilitates BP/CR plan, supports decision for transport or referral, has access to (financial, practical) systems, purchases necessary medicines and materials                                         | Recognized normal labor, danger signs, knows BP/CR plan, transportation system and has access to personal savings or existing emergency funds                                                |
| Promotes improved care during postpartum and newborn care, ensures evidence based skilled care policies, supports policies for management of complications, ensures adequate levels of resources and protocols, encourages participation | Has essential equipment and drugs, follows guidelines on postpartum and newborn care, functional emergency system, ensures 24.7 care, is gender and culturally sensitive, involves communities and reviews cases                                                 | Postpartum and newborn<br>Provides skilled postpartum and newborn care (recognizes complications, promotes health and prevents disease in woman and newborn, provides counseling and education, referral if needed), supports and respects community expectations and educates about BP/CR | Advocates for skilled provider in postpartum period, makes sure woman is not alone in postpartum period, recognizes danger signs, supports transportation, functioning blood donation system, educates about complication readiness, is in dialogue with facility           | Supports use of postpartum care, recognizes danger signs, agrees with woman decision making process, knows transportation system, supports provider and woman in referral, has knowledge on available (financial, practical) systems and knows how to access them | Seeks postpartum and newborn care at least twice, recognized danger signs, has knowledge on available (financial, practical) systems, recognizes danger signs and acts according to the plan |
